# Supplementary material for: ESIPT blocked CHEF based differential dual sensor for Zn2+ and Al3+in a pseudo-aqueous medium with intracellular bio-imaging applications and computational studies
Source: Royal Society of Chemistry journal article supplement (doi:10.1039/c5ra18424j), 2015-12-03
Supplement: c5ra18424j1.pdf [file c5ra18424j1.pdf]

# ESIPT blocked CHEF based differential dual sensor for Zn<sup>2+</sup> and Al<sup>3+</sup> in pseudo-aqueous medium with intracellular bio-imaging applications and computational studies<sup>†</sup>

Rabiul Alam<sup>a</sup>, Tarun Mistri<sup>a</sup>, Rahul Bhowmick<sup>a</sup>, Atul Katarkar<sup>b</sup>, Keya Chaudhuri<sup>b</sup> and  
Mahammad Ali<sup>\*a</sup>

<sup>a</sup>Department of Chemistry, Jadavpur University, Kolkata 700 032, India, Fax: 91-33-2414-6223, E-mail: [m\\_ali2062@yahoo.com](mailto:m_ali2062@yahoo.com),

<sup>b</sup>Molecular & Human Genetics Division, CSIR-Indian Institute of Chemical Biology, 4 Raja S.C. Mullick Road, Kolkata-700032, India

## Supporting Information for Publication

| Table of contents                                                                                            |             |
|--------------------------------------------------------------------------------------------------------------|-------------|
| <sup>1</sup> H NMR spectrum of H <sub>3</sub> SAL-NH in DMSO-d <sub>6</sub> , in Bruker 300 MHz instrument.  | Figure S1   |
| <sup>13</sup> C NMR spectrum of H <sub>3</sub> SAL-NH in DMSO-d <sub>6</sub> , in Bruker 300 MHz instrument  | Figure S2   |
| Mass spectrum of H <sub>3</sub> SAL-NH                                                                       | Figure S3   |
| Mass spectrum of Zn complex                                                                                  | Figure S3a  |
| Mass spectrum of Al complex                                                                                  | Figure S3b  |
| Absorption titration of with Al <sup>3+</sup> in THF-H <sub>2</sub> O (6:4, v/v) in HEPES buffer             | Figure S4   |
| Lifetime plot of ligand and ligand+ Zn <sup>2+</sup> in T.H.F:H <sub>2</sub> O (6:4 (V/V) in HEPES buffer    | Figure S5   |
| Lifetime plot of ligand and ligand+ Al <sup>3+</sup> in T.H.F:H <sub>2</sub> O(6:4 (V/V) in HEPES buffer.    | Figure S6   |
| UV-vis spectrum and Fluorescence excitation spectra of the ligand.                                           | Figure S7   |
| Spectra of Al <sup>3+</sup> and after the addition of 1 equivalent Zn <sup>2+</sup>                          | Figure S8   |
| Reversibility plot of Zn <sup>2+</sup> and Al <sup>3+</sup> complex With Na <sub>2</sub> H <sub>2</sub> EDTA | Figure S9   |
| LOD determination                                                                                            | Figure S10  |
| FT-IR spectrum of H <sub>3</sub> SAL-NH in KBr pellet.                                                       | Figure S11  |
| FT-IR spectrum of Al Complex(complex 1)                                                                      | Figure S11a |
| FT-IR spectrum of Zn Complex (complex 2)                                                                     | Figure S11b |
| Frontier molecular orbitals involved in the UV-vis absorption of complex 2.                                  | Figure S12  |
| % cell viability study                                                                                       | Figure S13  |

|                                                                                                                                                         |             |
|---------------------------------------------------------------------------------------------------------------------------------------------------------|-------------|
| <sup>1</sup> H-NMR chemical shifts in ppm of selected H-atoms in DMSO-d <sub>6</sub>                                                                    | Table S1    |
| Selective bond distance and bond angles of H <sub>3</sub> SAL-NH, complex 1 and complex 2                                                               | Table S2    |
| Selected parameters for the vertical excitation of H <sub>3</sub> SAL-NH                                                                                | Table S3    |
| Main calculated optical transition for the complex 1                                                                                                    | Table S4    |
| Main calculated optical transition for the complex 2                                                                                                    | Table S5    |
| Emission band at lower wavelength (around 430 nm) and at higher Wavelength (above 520 nm) in various solvents.                                          | Figure S14. |
| Titration with Al <sup>3+</sup> in presence of 1equivalent H <sub>2</sub> SAL-NH—Zn <sup>2+</sup> and 1 equivalent Na <sub>2</sub> H <sub>2</sub> EDTA. | Figure S15  |

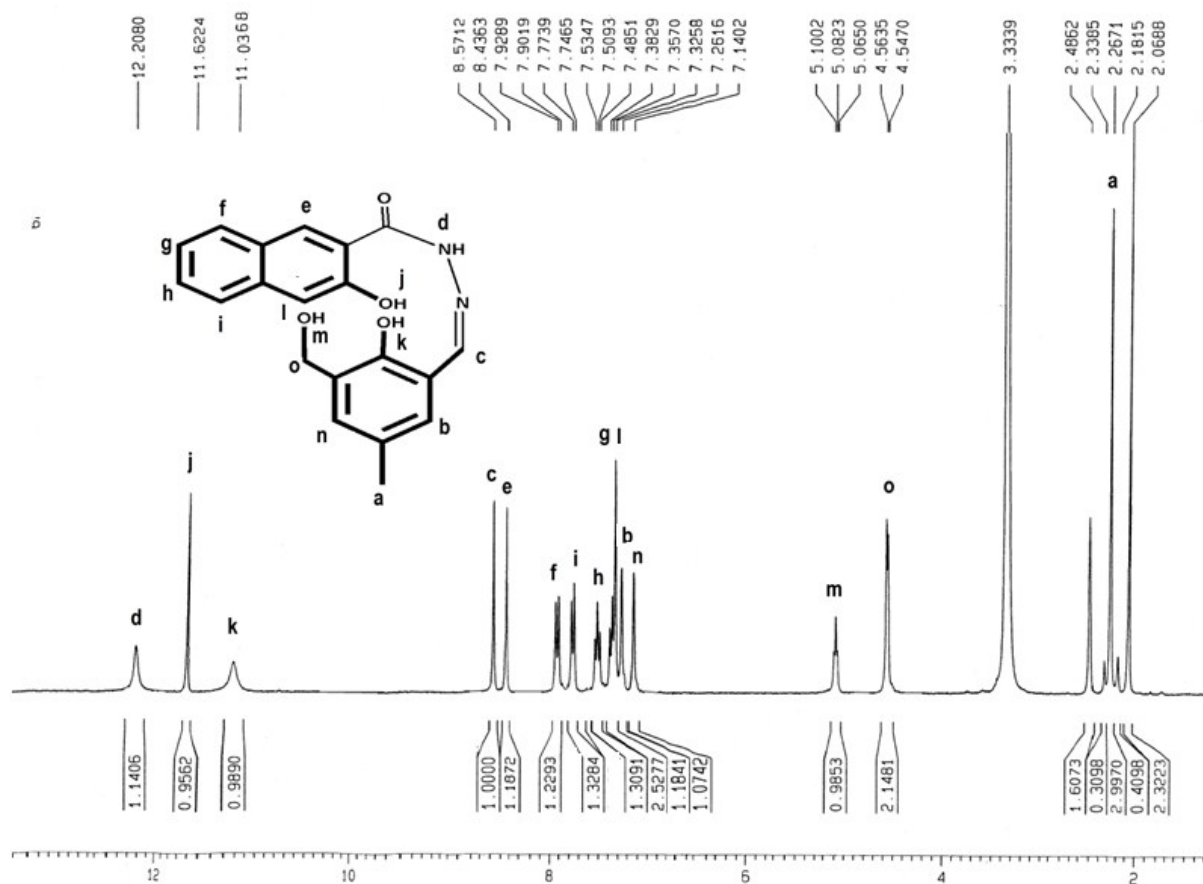

**Figure S1.** <sup>1</sup>H NMR spectrum of H<sub>3</sub>SAL-NH in DMSO-d<sub>6</sub>, in Bruker 300 MHz instrument.

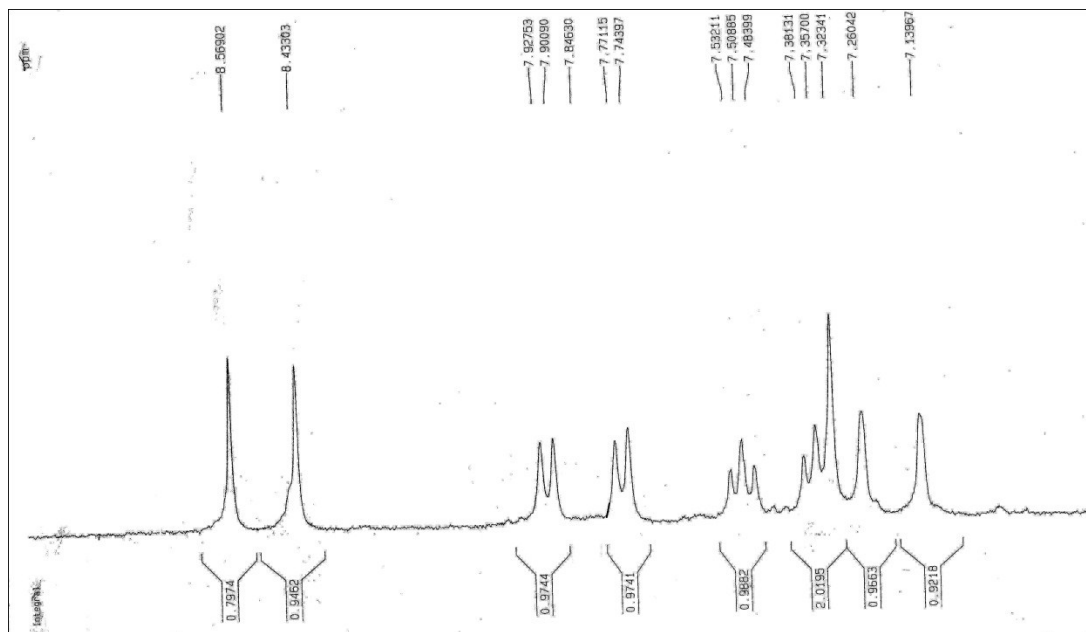

**Figure S1.** <sup>1</sup>H NMR spectrum of H<sub>3</sub>SAL-NH in DMSO-d<sub>6</sub>, in Bruker 300 MHz instrument. (Enlarge spectra 9-6 ppm)

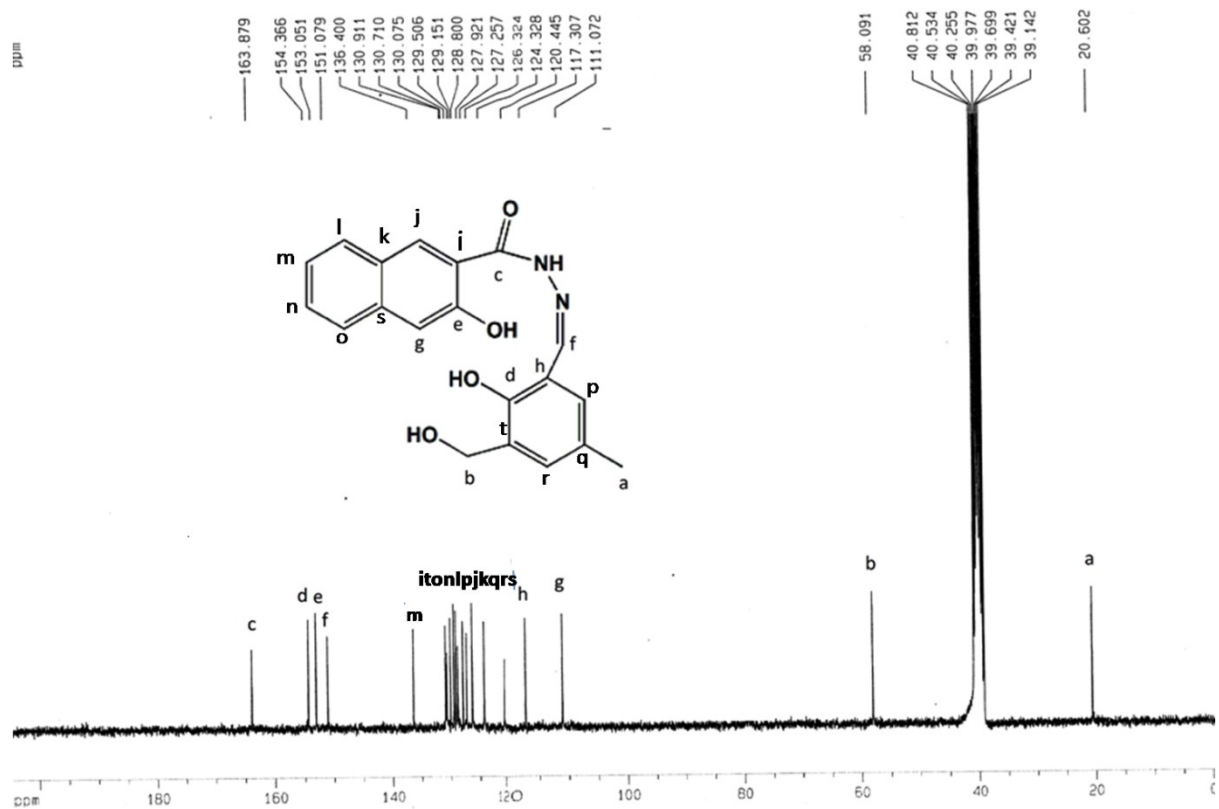

Figure S2.  $^{13}\text{C}$ -NMR spectrum of  $\text{H}_3\text{SAL-NH}$  in  $\text{DMSO-d}_6$ , in Bruker 300 MHz instrument.

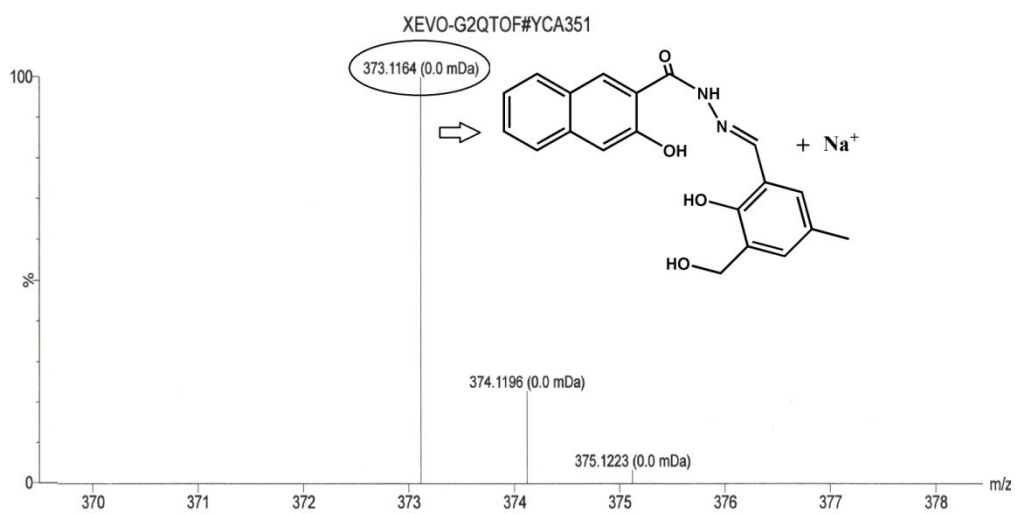

**Figure S3.** Mass spectrum of H<sub>3</sub>SAL-NH in THF.

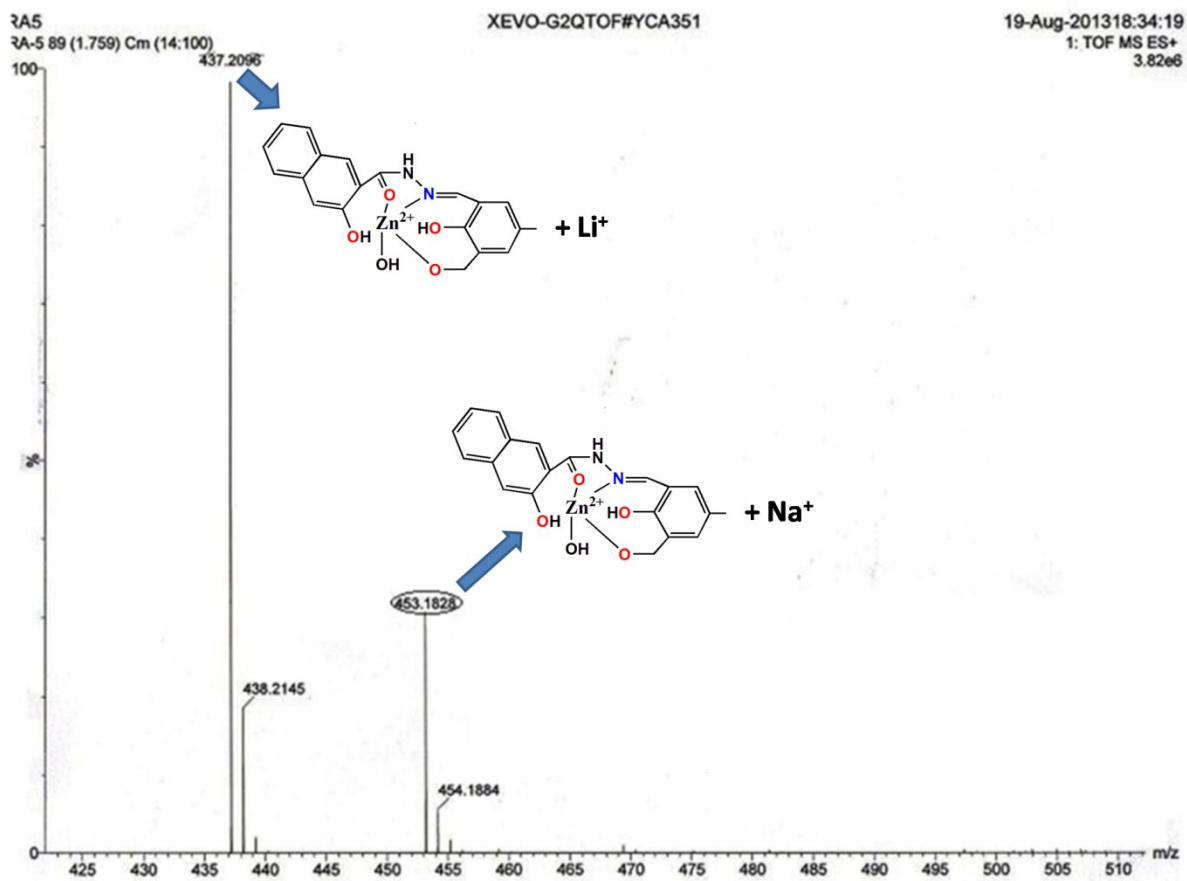

Figure S3a. Mass spectrum of H<sub>2</sub>SAL-NH-Zn<sup>2+</sup> in THF.

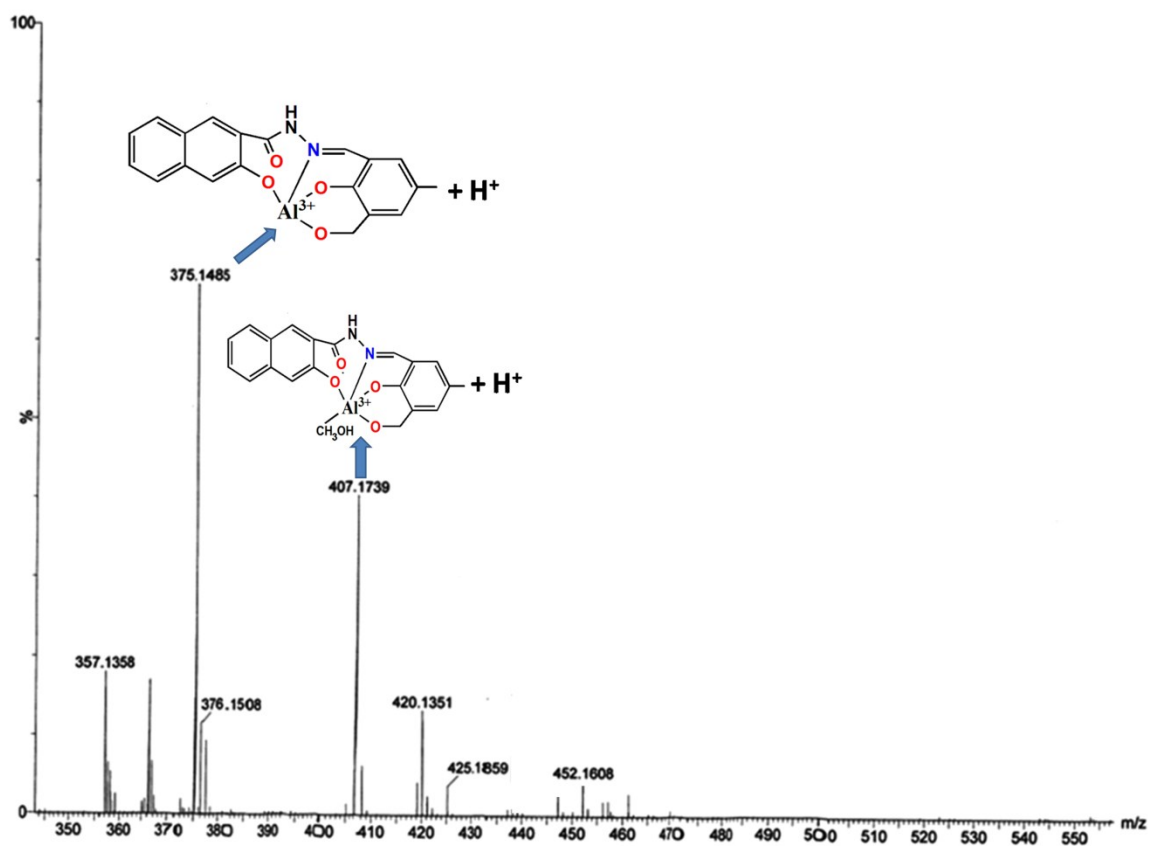

Figure S3b. Mass spectrum of SAL-NH-Al<sup>3+</sup> in MeOH.



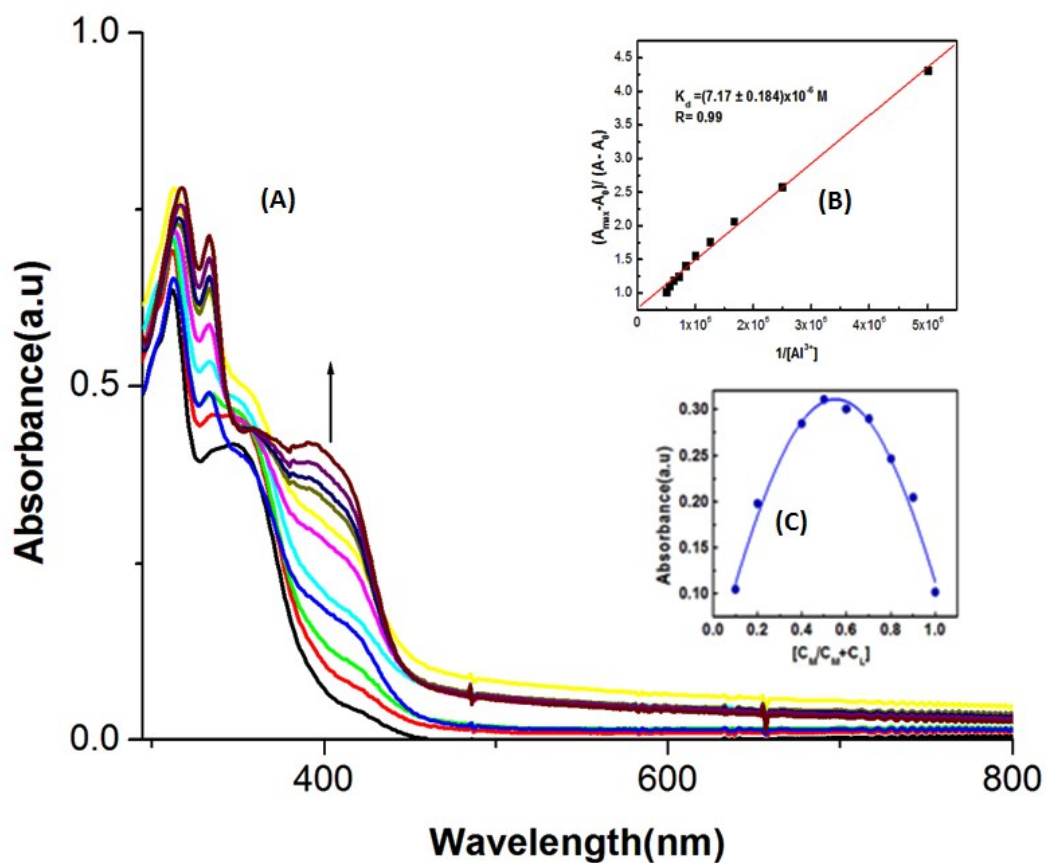

**Figure S4.** (A) Absorption titration of  $\text{H}_3\text{SAL-NH}$  with  $\text{Al}^{3+}$  in THF- $\text{H}_2\text{O}$  (6:4, v/v) in HEPES buffer (1 mM) at pH 7.2; (B) Benesi-Hilderbrand plot; (C) Job's Plot.

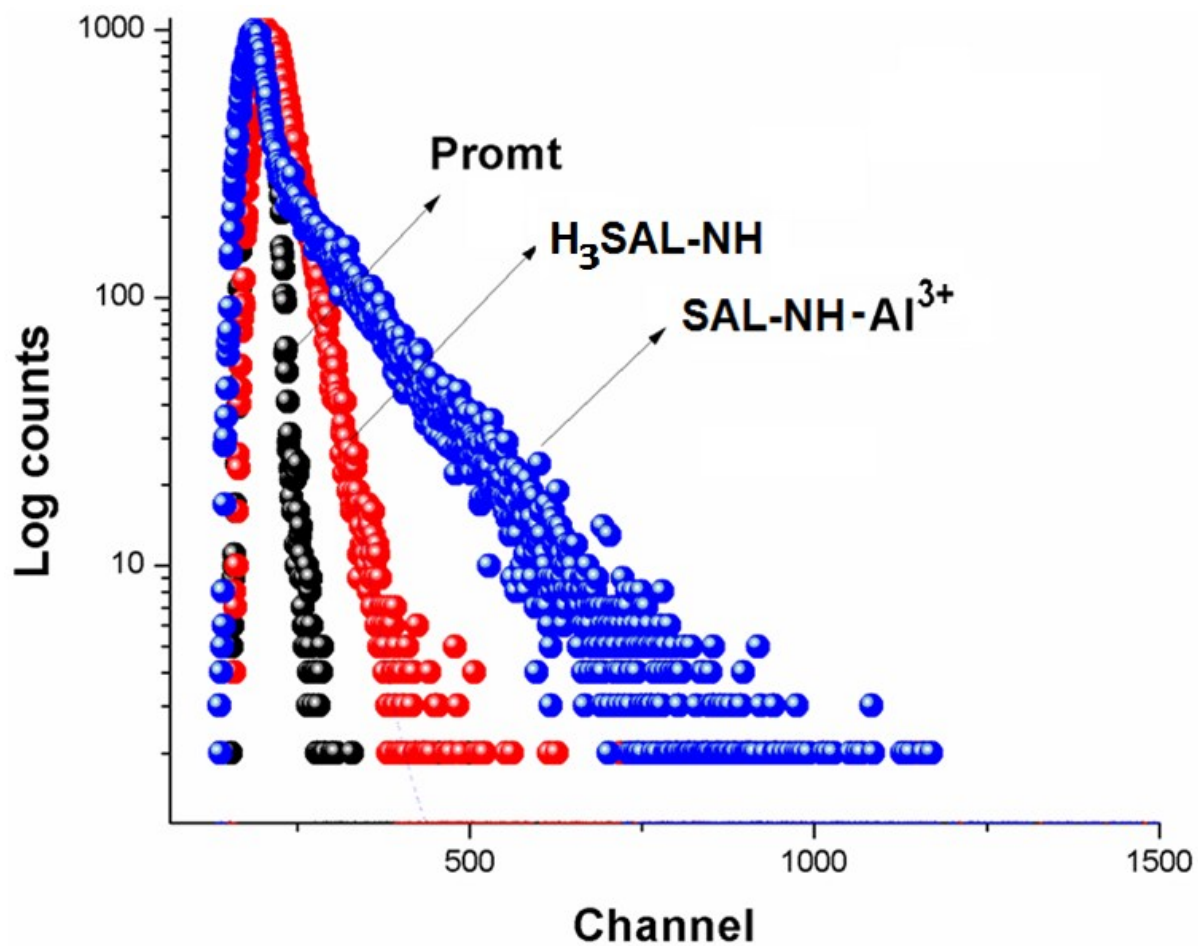

Figure S5. Lifetime plot of H<sub>3</sub>SAL-NH and SAL-NH - Al<sup>3+</sup> in T.H.F:H<sub>2</sub>O (6:4 (V/V) in HEPES buffer.

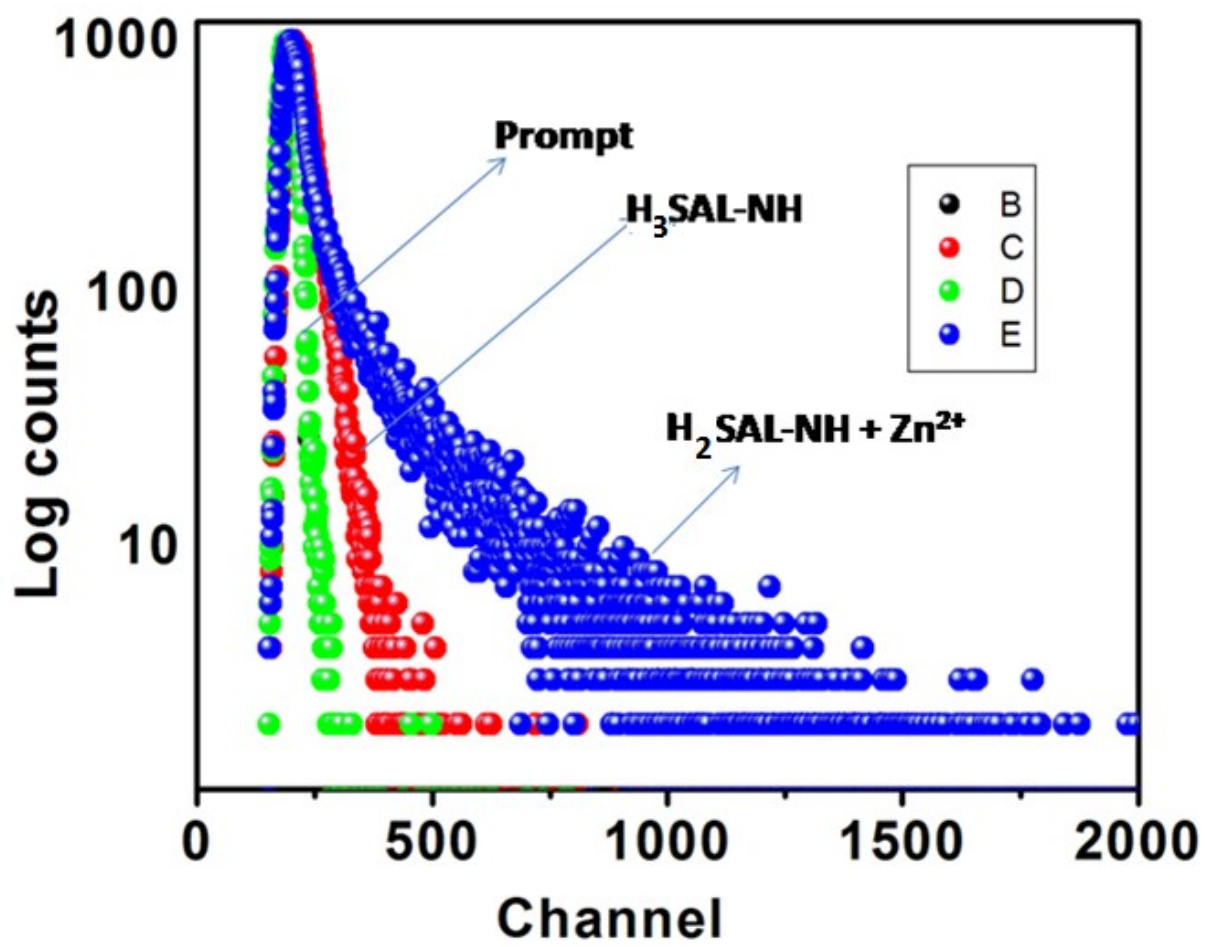

Figure S6. Lifetime plot of  $H_3SAL-NH$  and  $H_2SAL-NH + Zn^{2+}$  in T.H.F: $H_2O$ (6:4 (V/V) in HEPES buffer.

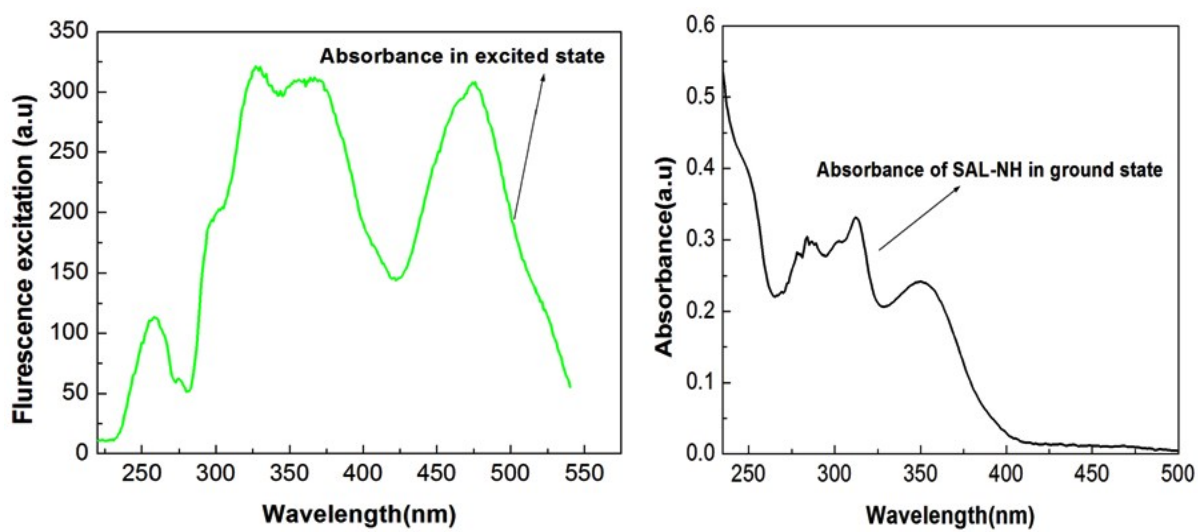

**Figure S7** : UV-vis spectrum and Fluorescence excitation spectra of the ligand.

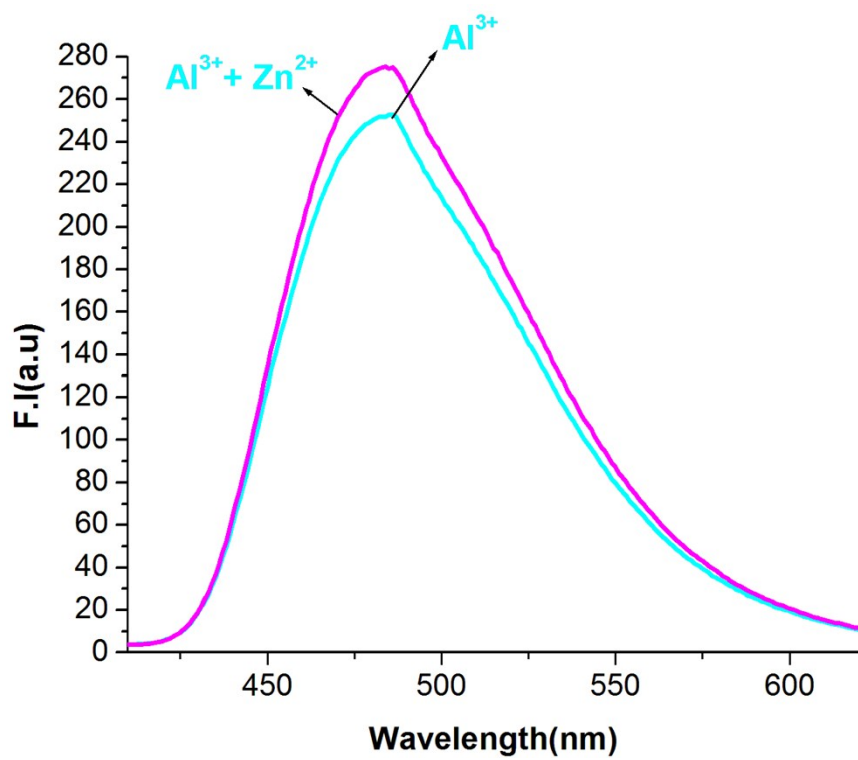

**Figure S8.** Spectra of Al<sup>3+</sup>-SAL-NH and after the addition of 1 equivalent Zn<sup>2+</sup>

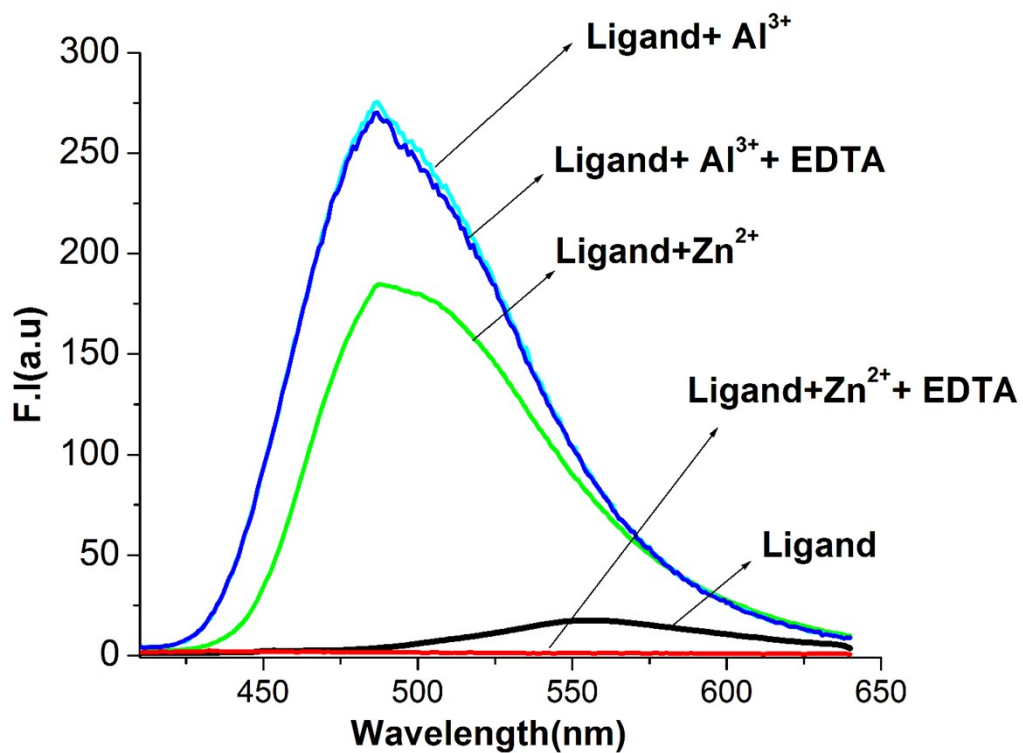

FigureS9. Reversibility plot of Zn<sup>2+</sup> and Al<sup>3+</sup> complex with Na<sub>2</sub>H<sub>2</sub>EDTA.

### Calculation of the limit of detection (LOD):

The detection limit DL of  $\text{H}_3\text{SAL-NH}$  for  $\text{M}^{2+}$  ( $\text{M} = \text{Zn}$  and  $\text{Al}$ ) was determined from  $3\sigma$  method by following equation:  $\text{DL} = K \cdot \text{Sb}_1 / S$

Where  $K = 2$  or  $3$  (we take  $3$  in this case);  $\text{Sb}_1$  is the standard deviation of the blank solution;  $S$  is the slope of the calibration curve obtained from Linear dynamic plot of FI vs.  $[\text{M}^{n+}]$ . ( $n=2,3$ )

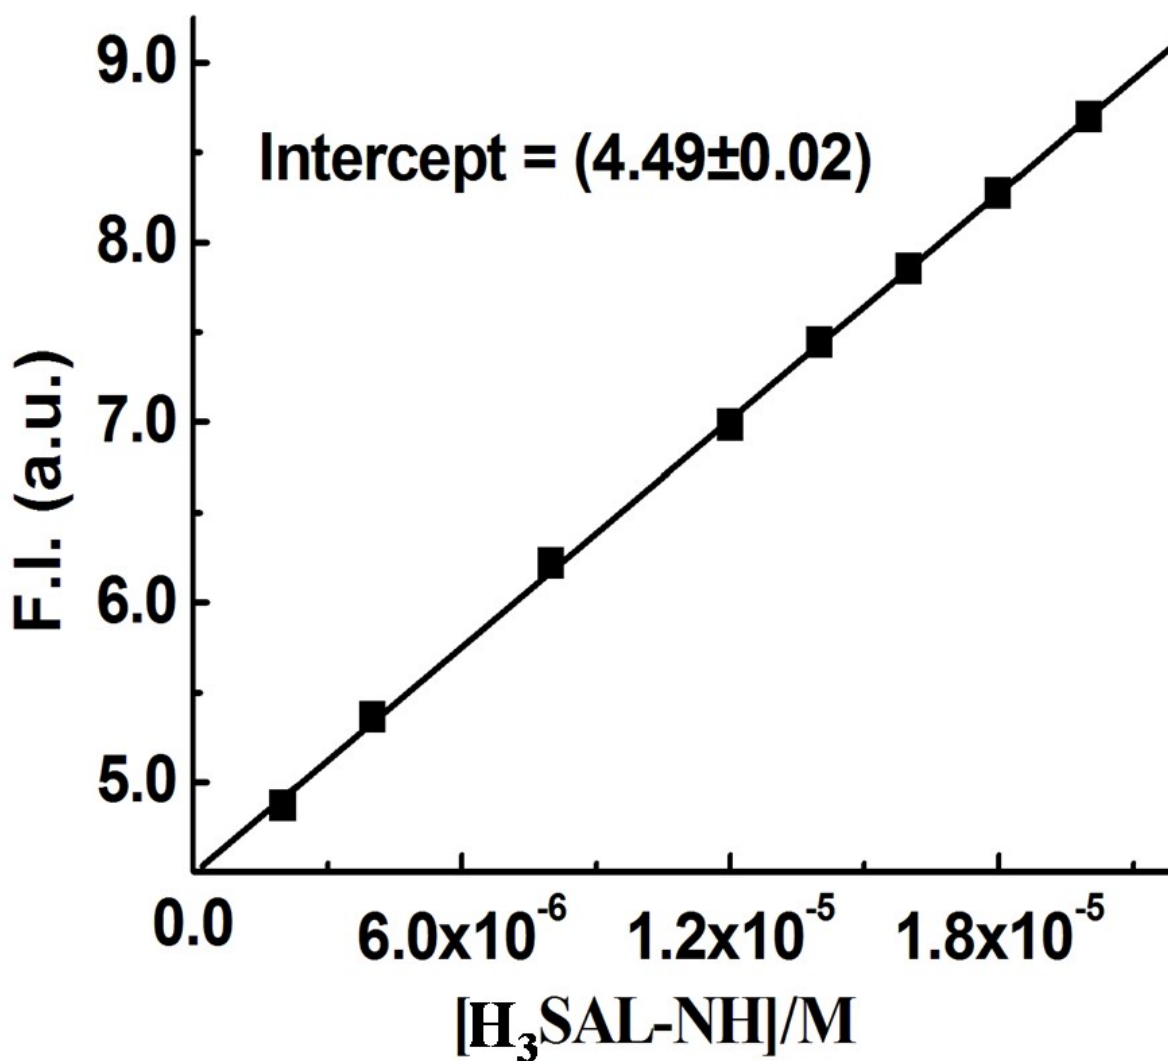

Figure S10. Determination of  $\text{Sb}_1$  or the blank,  $\text{H}_3\text{SAL-NH}$  solution.

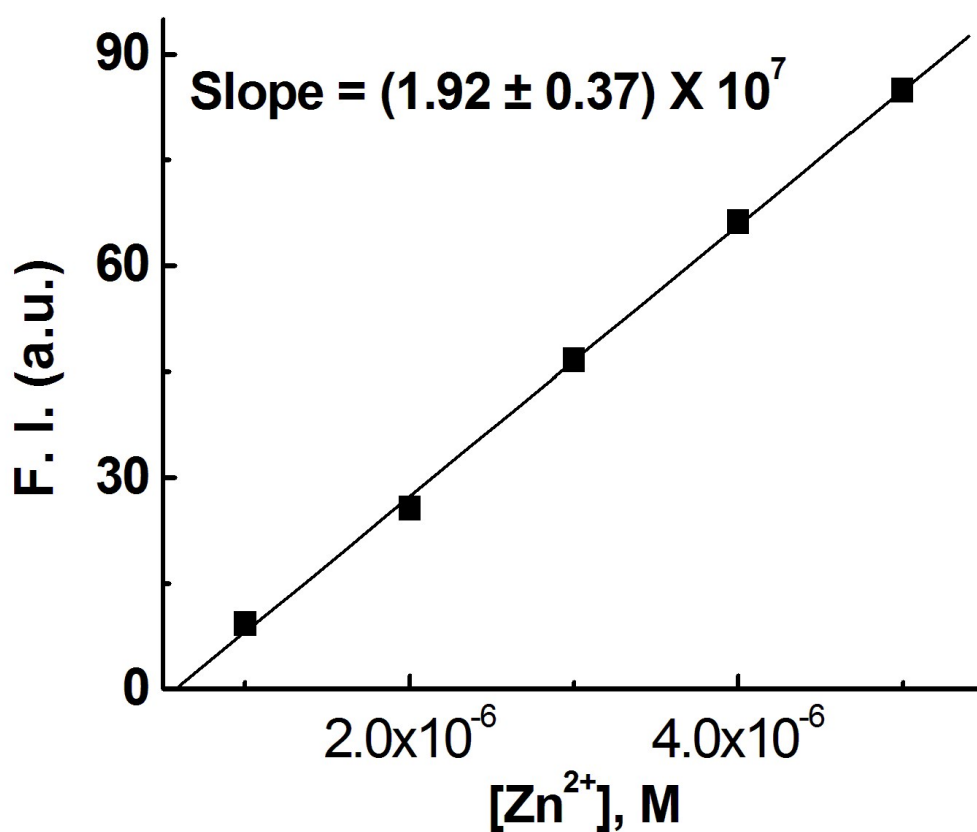

**Figure S10a.** Linear dynamic plot of FI at 496 nm vs. [Zn<sup>2+</sup>] for the determination of S (slope); [H<sub>3</sub>SAL-NH] = 20 μM

$$\text{LOD (Zn}^{2+}\text{)} = (3 \times 0.02) / 1.92 \times 10^7 = 3.1 \text{ nM}$$



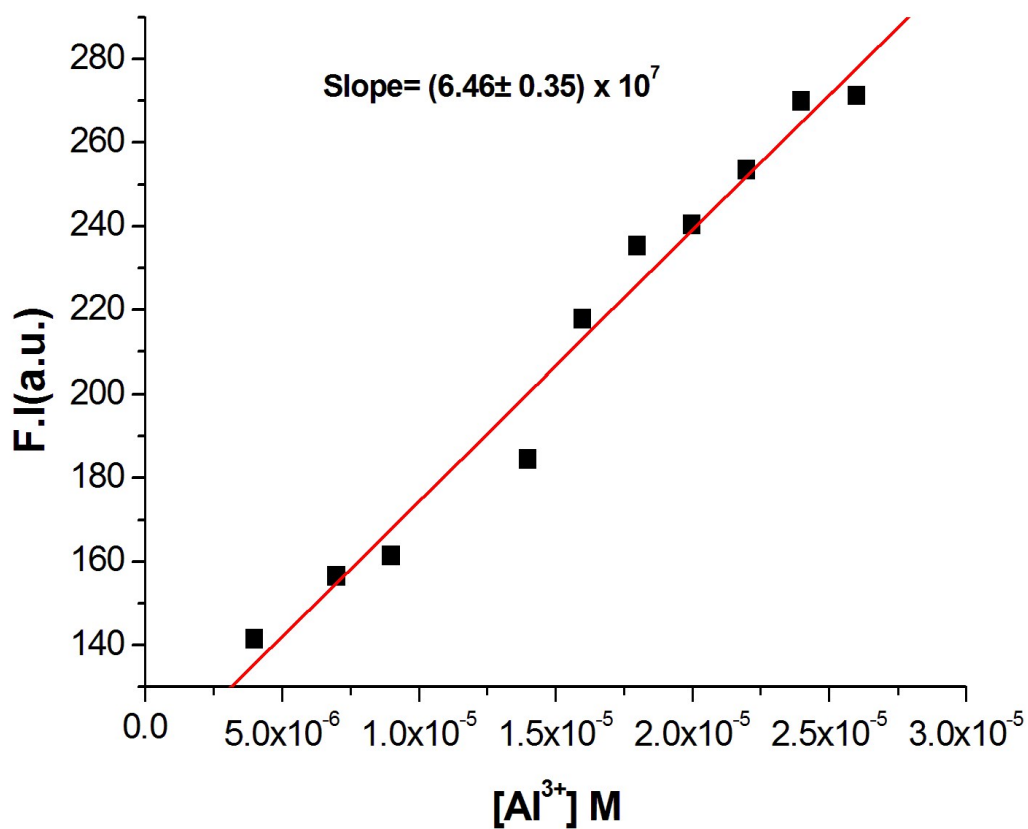

**Figure S10b.** Linear dynamic plot of FI at 486 nm vs. [Al<sup>3+</sup>] for the determination of S (slope); [H<sub>3</sub>SAL-NH] = 20 μM

$$\text{LOD (Al}^{3+}\text{)} = (3 \times 0.02) / 6.46 \times 10^7 = 0.92 \text{ nM}$$

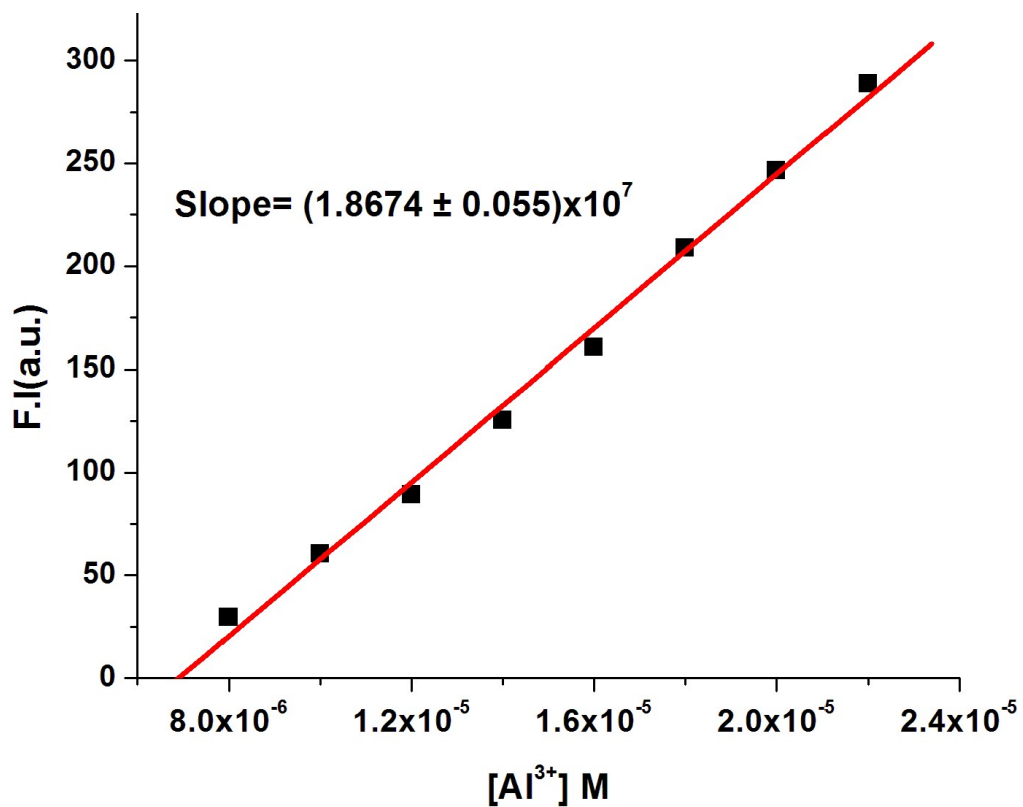

**Figure S10c.** Linear dynamic plot of FI at 486 nm vs. [Al<sup>3+</sup>] for the determination of S (slope); [H<sub>3</sub>SAL-NH] = 20 μM, [Na<sub>2</sub>H<sub>2</sub>EDTA] = 20 μM, [Zn<sup>2+</sup>] = 20 μM.

$$\text{LOD (Al}^{3+}\text{)} = (3 \times 0.02) / 1.86 \times 10^7 = 3.2 \text{ nM}$$

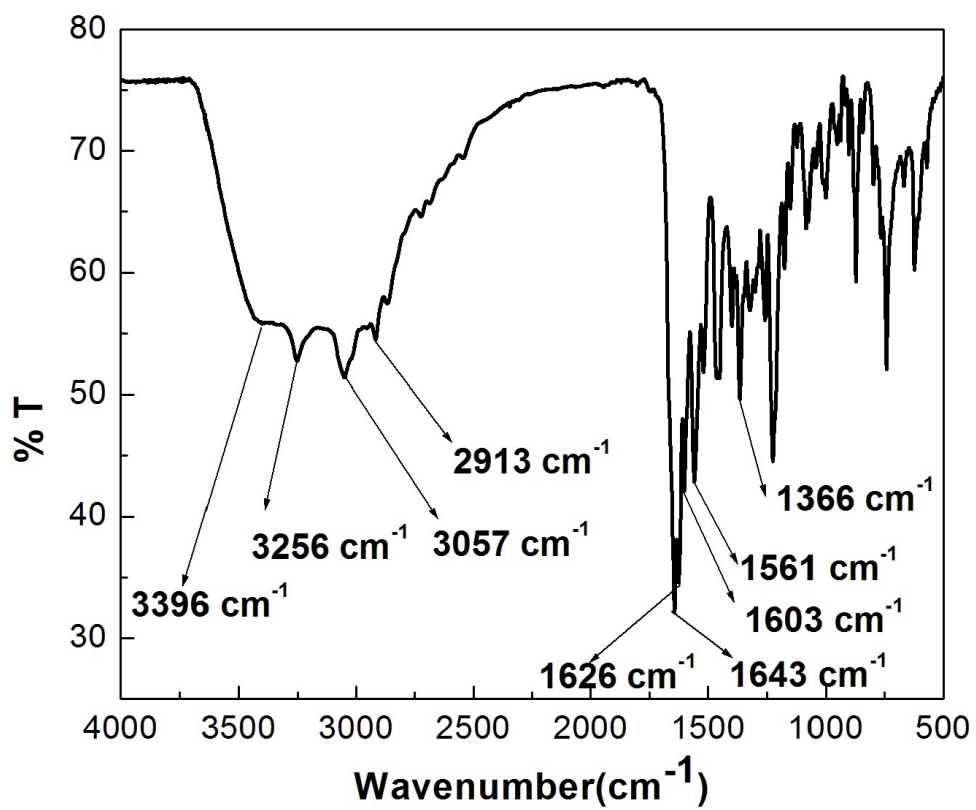

Figure S11. FT-IR spectrum of H<sub>3</sub>SAL-NH in KBr pellet.

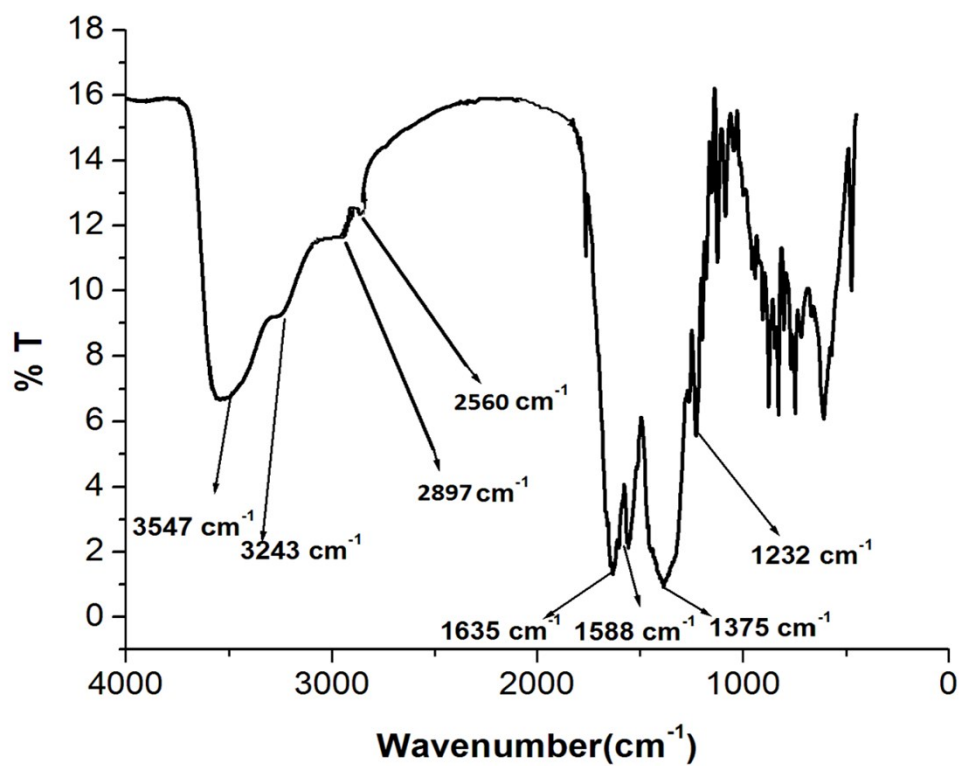

**Figure S11a.** FT-IR spectrum of complex 1 in KBr pellet.

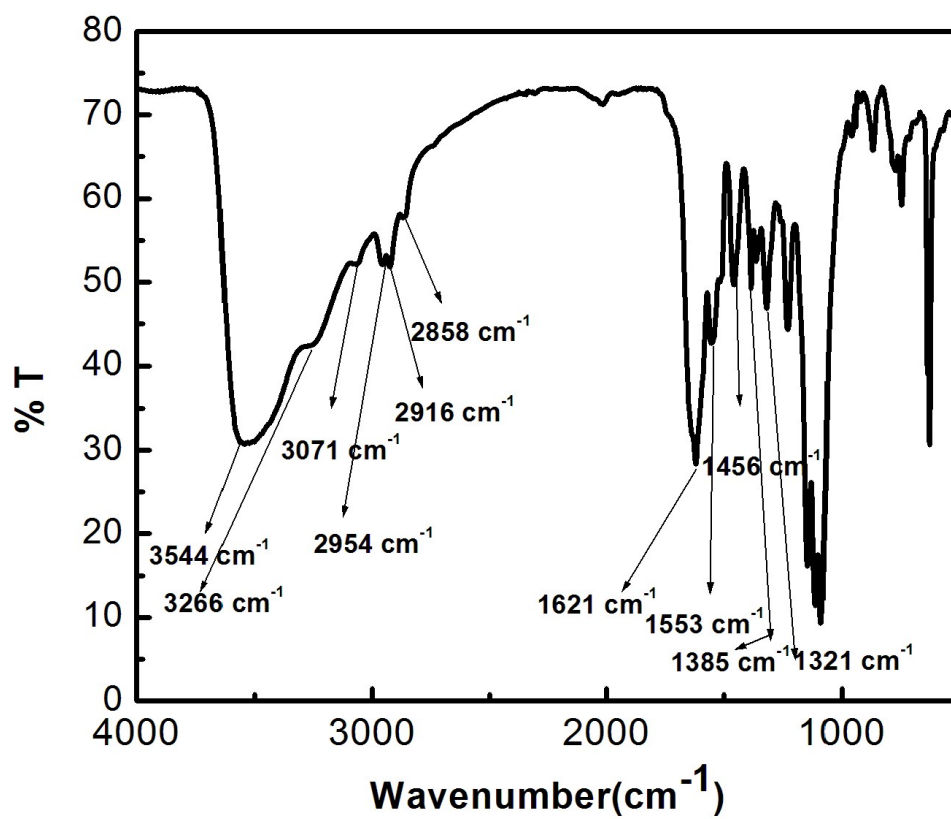

Figure S11b. FT-IR spectrum of complex 2 in KBr pellet.

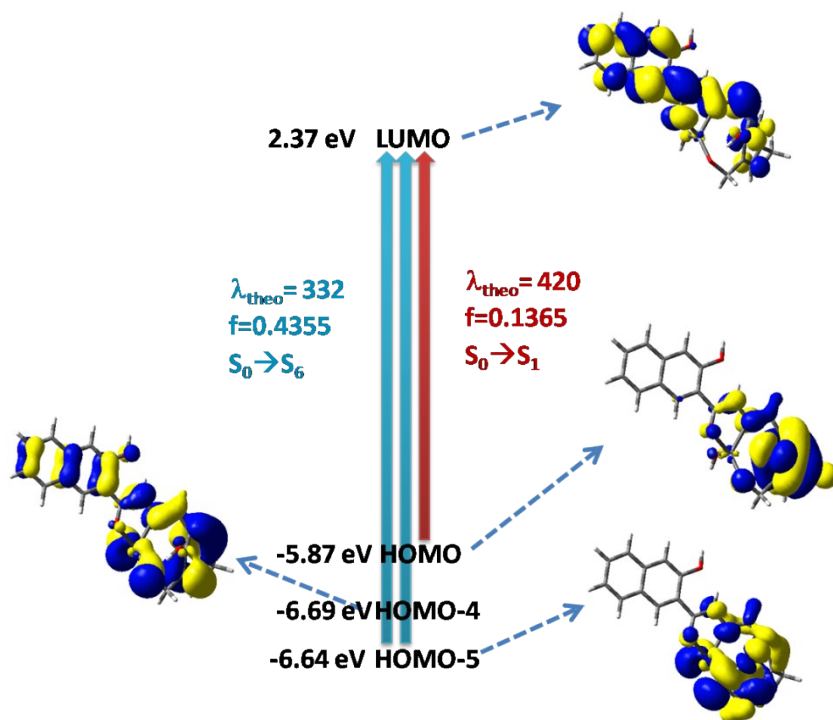

**Figure S12.** Frontier molecular orbitals involved in the UV-Vis absorption of the Zn-H<sub>2</sub>SAL-NH complex in THF solutions.

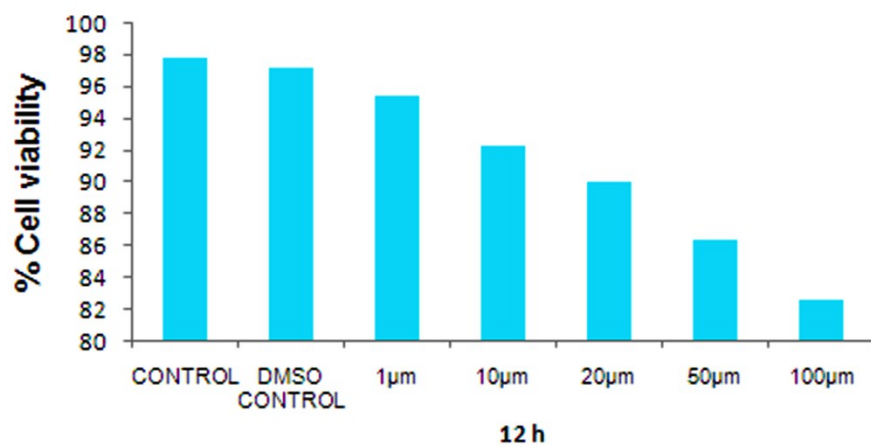

**Figure S13.** % cell viability of HepG2 cells treated with different concentrations (1 µM-100 µM) of H<sub>3</sub>SAL-NH for 12 hour determined by MTT assay. Results were expressed as mean of three independent experiments.

### Quantum Yield Determination:

Fluorescence quantum yields ( $\Phi$ ) were estimated by integrating the area under the

fluorescence curves with the equation:  $\Phi_{sample} = \frac{OD_{std}}{OD_{sample}} \times \frac{A_{sample}}{A_{std}} \times \Phi_{std}$

where, A was the area under the fluorescence spectral curve, OD was optical density of the compound at the excitation wavelength and  $\eta$  was the refractive indices of the solvent. Coumarine 153 was used as quantum yield standard (quantum yield is 0.54 in water) for measuring the quantum yields of  $H_3SAL-NH$  and  $[SAL-NH-Al^{3+}]$  and  $[H_2SAL-NH-Zn^{2+}]$  systems.





**Table S2a: Selective bond distance and bond angles of H<sub>3</sub>SAL-NH.**

| Bond distance(Å) |       | Bond angles(°) |        |
|------------------|-------|----------------|--------|
| N22-N21          | 1.376 | N21 C19 O20    | 123.21 |
| C19-O20          | 1.249 | C14 C19 O20    | 120.41 |
| C24-N22          | 1.298 | C25 C24 N22    | 120.73 |
| C15-O17          | 1.402 | C14 C15 O17    | 117.85 |
| C27-O42          | 1.387 | C25 C26 C28    | 121.17 |
|                  |       |                |        |

**Table S2b: Selective bond distance and bond angles of SAL-NH–Al<sup>3+</sup> complex(1).**

| Bond distance(Å) |       | Bond angles(°) |        |
|------------------|-------|----------------|--------|
| Al25-O30         | 1.998 | N4 Al25 O22    | 130.64 |
| Al25-O22         | 1.815 | O22 Al25 O23   | 91.48  |
| Al25-O23         | 1.856 | N4 Al25 O48    | 95.60  |
| Al25-N4          | 2.107 | N4 Al25 O30    | 89.96  |
| Al25-O48         | 1.806 | O22 Al25 O48   | 132.15 |
| -----            | ----- | O23 Al25 O48   | 109.63 |
| -----            | ----- | O23 Al25 O30   | 167.31 |
| -----            | ----- | O30 Al25 O48   | 80.16  |

**Table S2c: Selective bond distance and bond angles of H<sub>2</sub>SAL-NH-Zn<sup>2+</sup> complex(2).**

| Bond distance(Å) |       | Bond angles(°) |        |
|------------------|-------|----------------|--------|
| Zn44-O45         | 1.841 | O40 Zn44 O45   | 129.87 |
| Zn44-O20         | 2.128 | N22 Zn44 O45   | 100.42 |
| Zn44-O40         | 1.956 | N22 Zn44 O40   | 119.66 |
| Zn44-N22         | 2.247 | O20 Zn44 O45   | 104.33 |
|                  |       | O20 Zn44 O40   | 114.58 |

**Table S3.** Selected parameters for the vertical excitation ( UV-VIS absorptions) of H<sub>3</sub>SAL-NH; electronic excitation energies (eV) and oscillator strength (f), configurations of the low-lying excited states of L; calculation of the S<sub>0</sub>→S<sub>n</sub> energy gaps on optimized ground- state geometries (UV-vis absorption).

| Electronic transition            | Composition     | Excitation energy | Oscillator strength (f) | CI      | Assign | λ <sub>exp</sub> (nm) |
|----------------------------------|-----------------|-------------------|-------------------------|---------|--------|-----------------------|
| S <sub>0</sub> → S <sub>4</sub>  | HOMO → LUMO     | 3.46eV (357 nm)   | <b>0.7285</b>           | 0.69765 | ILCT   | 350                   |
| S <sub>0</sub> → S <sub>11</sub> | HOMO – 2 → LUMO | 3.9850 eV (311nm) | <b>0.1418</b>           | 0.63613 | ILCT   | 313                   |
|                                  | HOMO → LUMO + 1 |                   |                         | 0.23905 | ILCT   |                       |
| S <sub>0</sub> → S <sub>12</sub> | HOMO – 4 → LUMO | 4.1734eV(297 nm)  | <b>0.4127</b>           | 0.17226 | ILCT   | 303                   |
|                                  | HOMO – 3 → LUMO |                   |                         | 0.17041 | ILCT   |                       |
|                                  | HOMO – 2 → LUMO |                   |                         | ----    | ILCT   |                       |
|                                  | HOMO → LUMO+1   |                   |                         | 0.60798 | ILCT   |                       |

**Table S4.** Main calculated optical transition for the complex 1 with composition in terms of molecular orbital contribution of the transition, vertical excitation energies, and oscillator strength in THF

| Electronic transition | Composition                   | Excitation energy | Oscillator strength ( <i>f</i> ) | CI      | Assign    | $\lambda_{\text{exp}}$ (nm) |           |
|-----------------------|-------------------------------|-------------------|----------------------------------|---------|-----------|-----------------------------|-----------|
| $S_0 \rightarrow S_2$ | HOMO-1 $\rightarrow$ LUMO     | 3.1024eV (399 nm) | <b>0.0565</b>                    | 0.53202 | MLCT/ILCT | 398                         |           |
|                       | HOMO $\rightarrow$ LUMO       |                   |                                  | 0.42889 |           |                             |           |
|                       | HOMO $\rightarrow$ LUMO + 1   |                   |                                  | -----   |           |                             |           |
| $S_0 \rightarrow S_5$ | HOMO - 4 $\rightarrow$ LUMO   | 3.6303 eV (341nm) | <b>0.0401</b>                    | ----    | MLCT/ILCT | 335                         |           |
|                       | HOMO-2 $\rightarrow$ LUMO     |                   |                                  | 0.59678 |           |                             | MLCT/ILCT |
|                       | HOMO-2 $\rightarrow$ LUMO+1   |                   |                                  | 0.19833 |           |                             | MLCT/ILCT |
| $S_0 \rightarrow S_6$ | HOMO - 4 $\rightarrow$ LUMO   | 3.9416eV(314 nm)  | <b>0.2680</b>                    | ----    | MLCT/ILCT | 321                         |           |
|                       | HOMO - 3 $\rightarrow$ LUMO   |                   |                                  | 0.57959 |           |                             | MLCT/ILCT |
|                       | HOMO - 2 $\rightarrow$ LUMO+1 |                   |                                  | ----    |           |                             | MLCT/ILCT |

**Table S5** Main calculated optical transition for the complex 2 with composition in terms of molecular orbital contribution of the transition, vertical excitation energies, and oscillator strength in THF

| Electronic transition | Composition                 | Excitation energy    | Oscillator strength ( <i>f</i> ) | CI      | Assign    | $\lambda_{\text{exp}}$ (nm) |
|-----------------------|-----------------------------|----------------------|----------------------------------|---------|-----------|-----------------------------|
| $S_0 \rightarrow S_1$ | HOMO $\rightarrow$ LUMO     | 2.9490eV<br>(420nm)  | 0.1365                           | 0.69534 | MLCT/ILCT | 412                         |
|                       | HOMO $\rightarrow$ LUMO + 1 |                      |                                  | ----    |           |                             |
| $S_0 \rightarrow S_6$ | HOMO - 5 $\rightarrow$ LUMO | 3.7267 eV<br>(332nm) | 0.4355                           | ----    | MLCT/ILCT | 335                         |
|                       | HOMO-4 $\rightarrow$ LUMO   |                      |                                  | 0.58118 | MLCT/ILCT |                             |

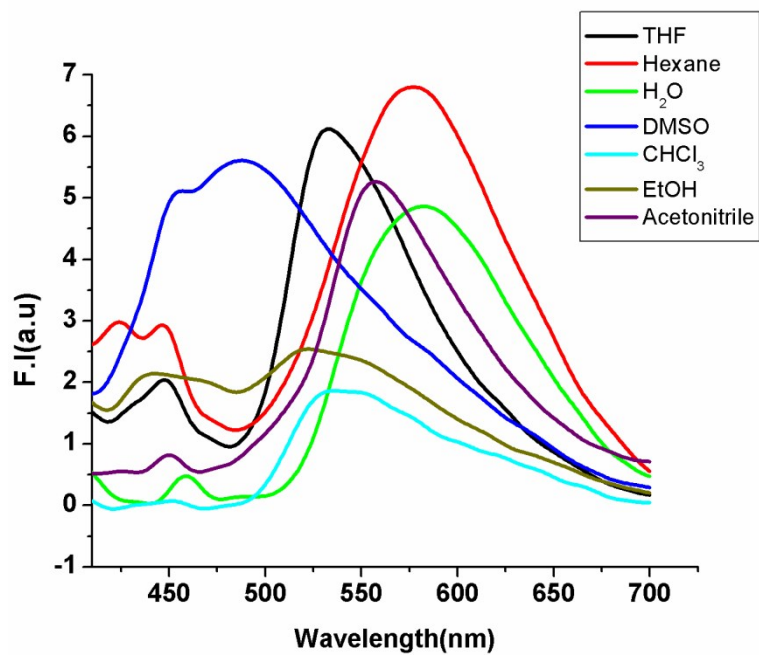

**Figure S14.** Emission band at lower wavelength (around 430nm) and at higher wavelength(above 520nm) in various solvents.

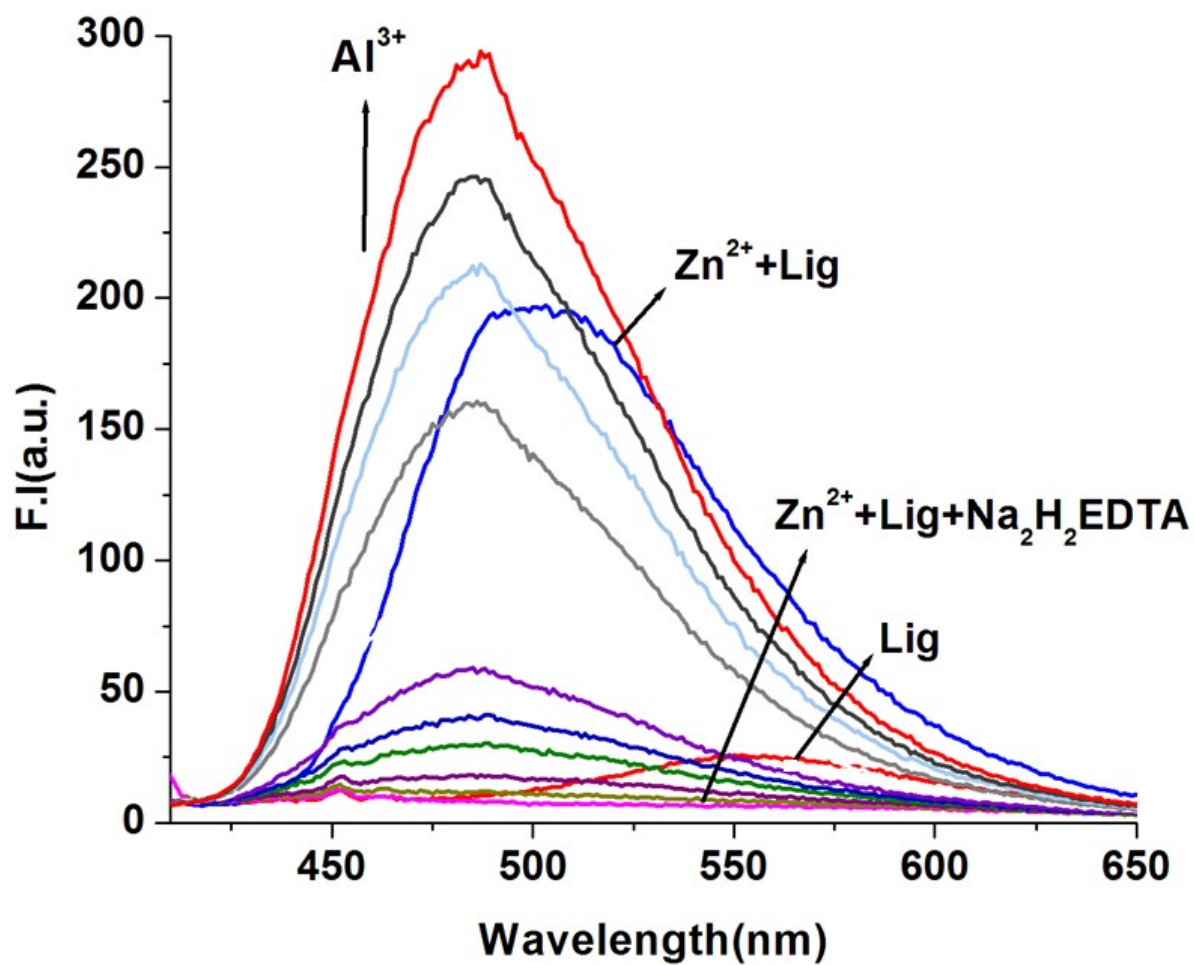

**Figure S15.** Titration with  $\text{Al}^{3+}$  in presence of 1 equivalent  $\text{H}_2\text{SAL-NH-Zn}^{2+}$  and 1 equivalent  $\text{Na}_2\text{H}_2\text{EDTA}$ .
